# Supplementary material
Source: PubMed Central journal article supplement (PMC3122911)
Supplement: supp_P013672_jlr.P013672-1.pdf [file supp_P013672_jlr.P013672-1.pdf]

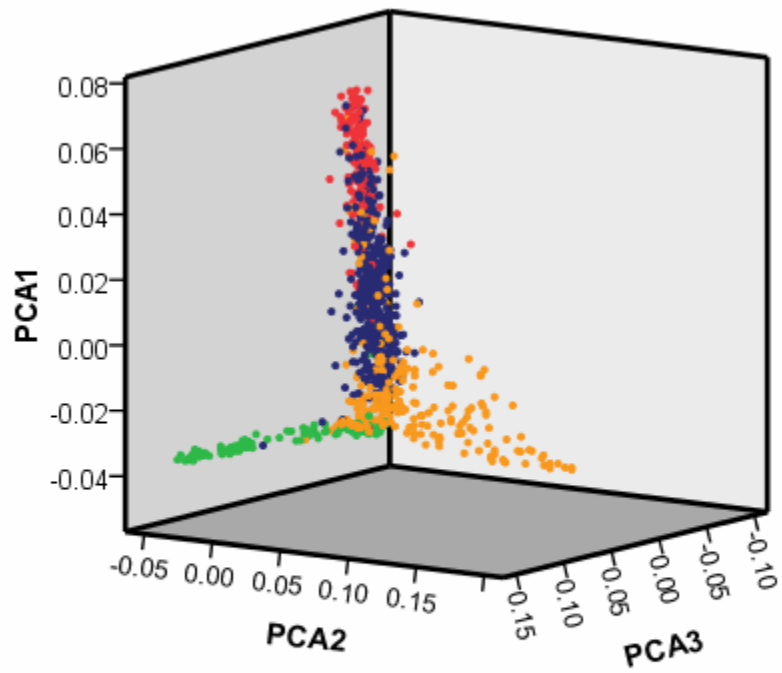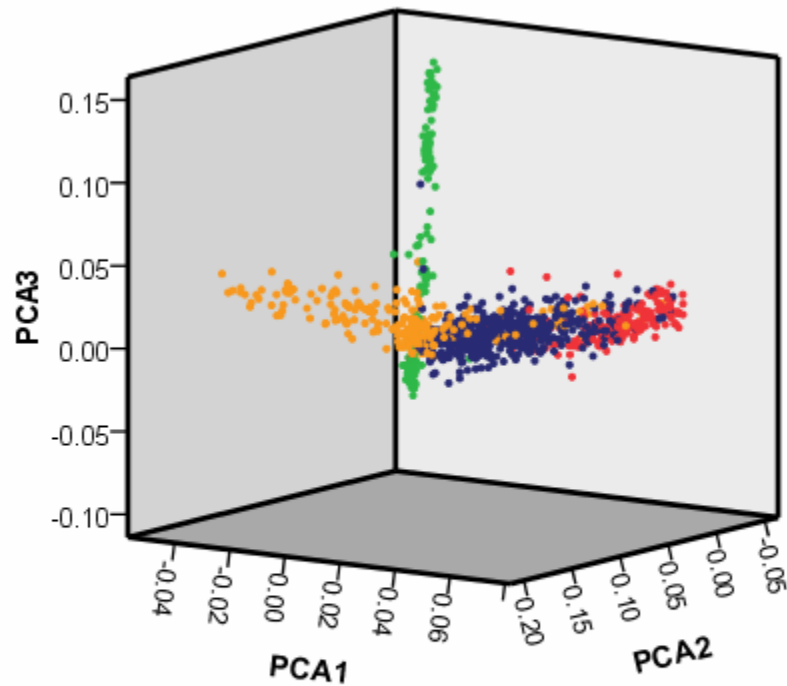

• NH-White     
 • NH-Black     
 • Dominican     
 • Other Carribean

**Supplemental Fig. 1** The top three axes of variation of the NOMAS subgroups.
